# Supplementary material for: Achieving high energy density/efficiency in light-metal-element-rich relaxor ferroelectric ceramics by annihilating volatile Schottky defects
Source: Royal Society of Chemistry journal article supplement (doi:10.1039/d4ta00867g), 2024-01-01
Supplement: d4ta00867g1.pdf [file d4ta00867g1.pdf]

## **Achieving giant energy density/efficiency in light-metal-element-rich relaxor ferroelectric ceramic by annihilating the volatile Schottky defects**

Kunjie Lou <sup>a,b,d,#</sup>, Yizheng Bao <sup>b,e,#</sup>, Jun Chai <sup>c,\*</sup>, Jiyue Wu <sup>b,e</sup>, Yanshuang Hao <sup>b,e</sup>, Shaozheng Zhang <sup>f</sup>, and Genshui Wang <sup>a,b,d,e\*</sup>

<sup>a</sup> School of Chemistry and Materials Science, Hangzhou Institute for Advanced Study, University of Chinese Academy of Sciences, Hangzhou 310024, P. R. China

<sup>b</sup> Key Laboratory of Inorganic Functional Materials and Devices, Shanghai Institute of Ceramics, Chinese Academy of Sciences, 588 Heshuo Road, Jiading District, Shanghai 201800, P. R. China.

<sup>c</sup> College of Chemical and Material Engineering, Quzhou University, Quzhou 324000, Zhejiang, China

<sup>d</sup> Center of Materials Science and Optoelectronics Engineering, University of Chinese Academy of Sciences, 19 Yuquan Road, Shijinshan District, Beijing 100049, P. R. China

<sup>e</sup> State Key Laboratory of High-Performance Ceramics and Superfine Microstructure, Shanghai Institute of Ceramics, Chinese Academy of Sciences, 1295 Dingxi Road, Changning District, Shanghai 200050, P. R. China

<sup>f</sup> College of Teacher Education, Quzhou University, Quzhou324000, China

### **Corresponding Author**

Email: [chaijun@qzc.edu.cn](mailto:chaijun@qzc.edu.cn)

Email: [genshuiwang@mail.sic.ac.cn](mailto:genshuiwang@mail.sic.ac.cn)

# These authors contribute to this work equally.

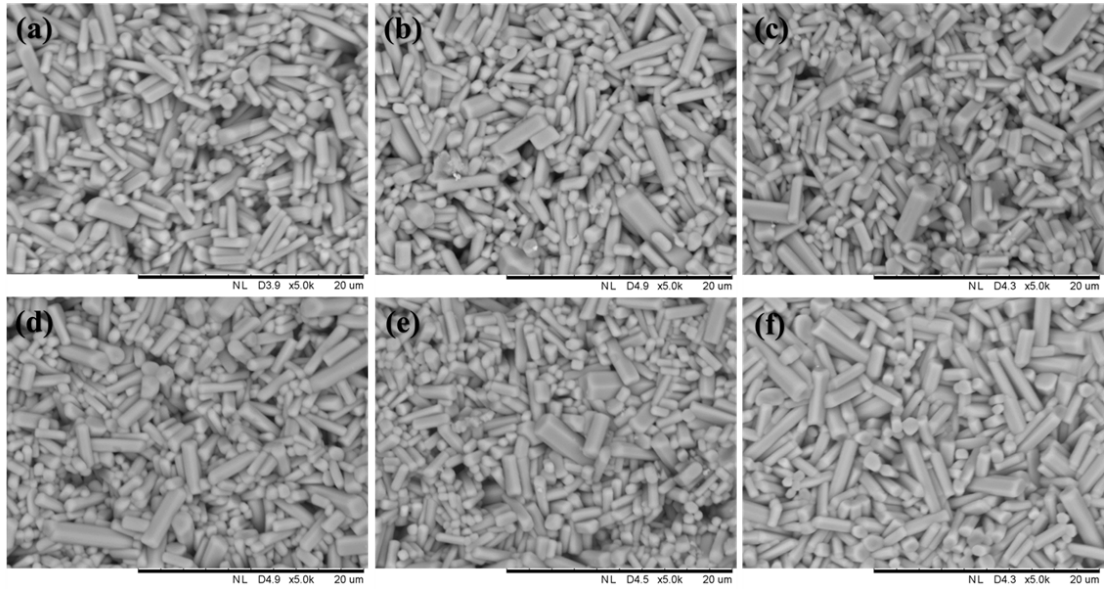

**Figure S1** (a)-(f) The SEM images of the KLGn-K<sub>x</sub> from x=0 to x=5

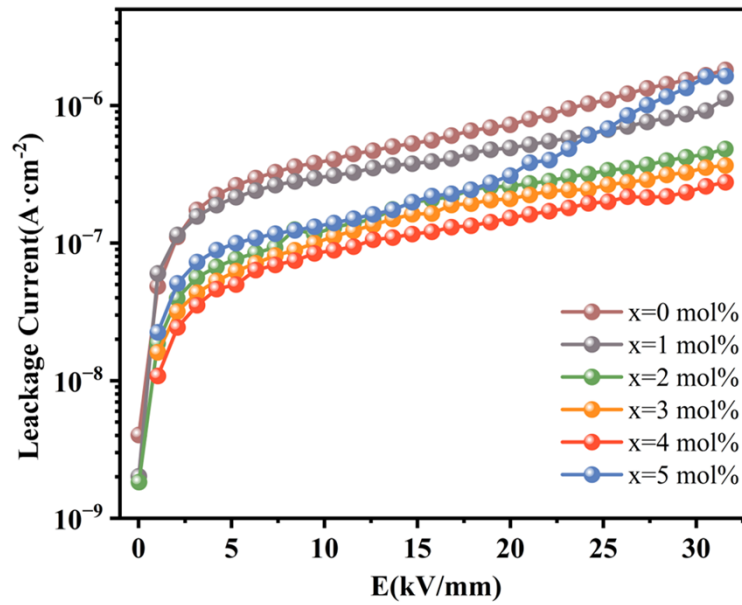

**Fig. S2.** Leakage current density as a function of biased DC electric field.

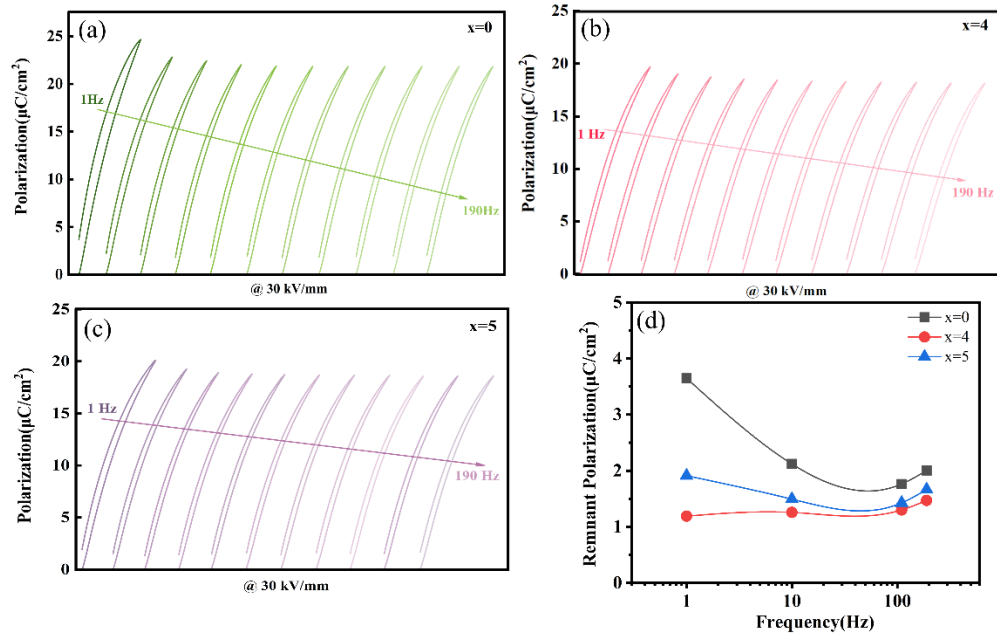

**Fig. S3.** The P-E loop under various frequencies (a)  $x=0$  (b)  $x=4$  (c)  $x=5$ , (d) The remnant polarization of  $x=0,4,5$  at different frequencies.
